# Supplementary material for: Addiction to Golgi-resident PI4P synthesis in chromosome 1q21.3–amplified lung adenocarcinoma cells
Source: PubMed Central journal article supplement — Proc Natl Acad Sci U S A. 2021 Jun 21;118(25):e2023537118. doi: 10.1073/pnas.2023537118 (PMC8237628; doi:10.1073/pnas.2023537118), 2021-06-21
Supplement: pnas.2023537118.sapp.pdf [file pnas.2023537118.sapp.pdf]

## Supplementary Figures and Tables

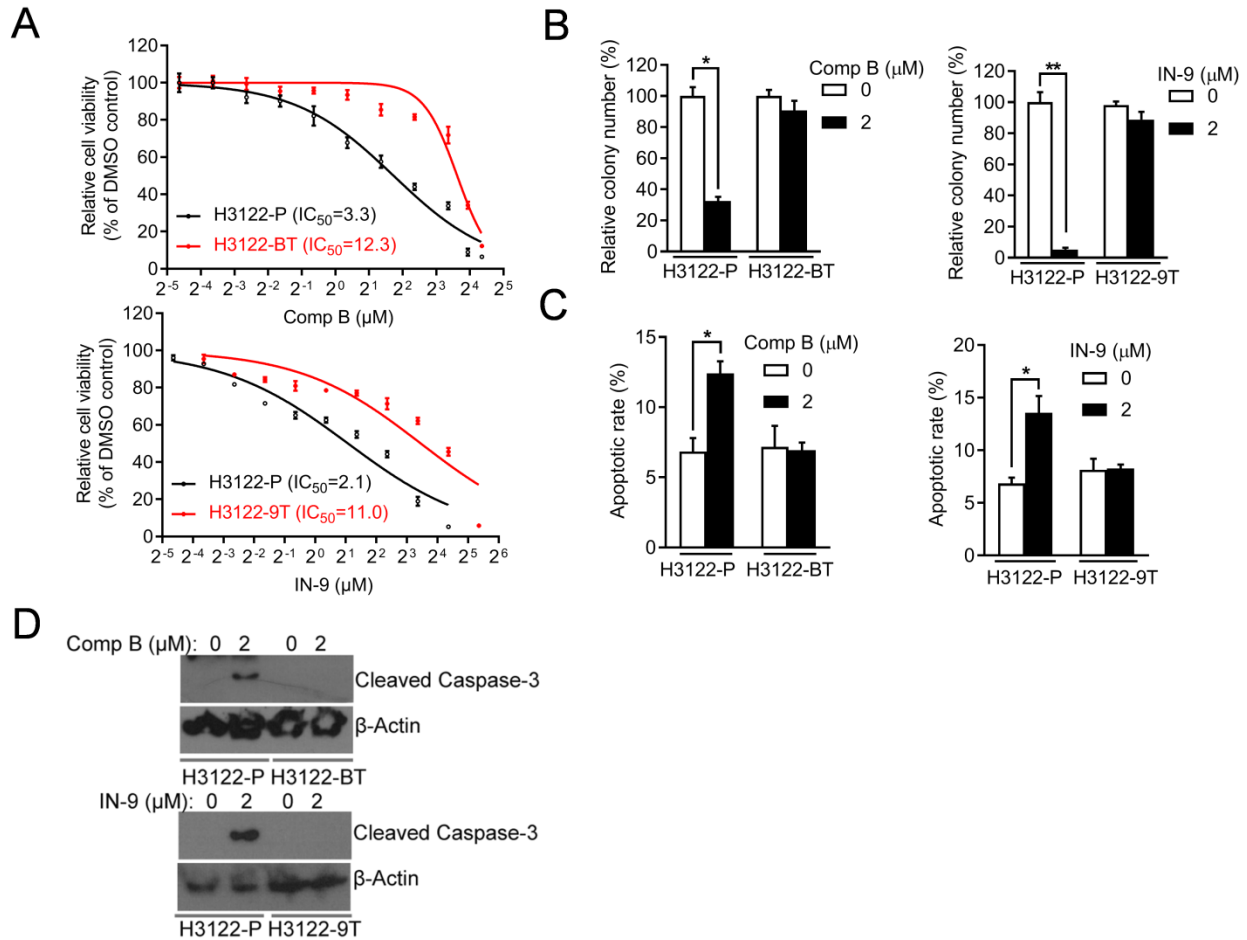

**Figure S1** Characterization of drug-tolerant H3122 cells. (A) Proliferation assays on parental (P), compound B-tolerant (BT), and IN-9-tolerant (9T) H3122 cells. Cells were treated for 4 days with the indicated concentrations of compound B or IN-9. Half-maximal inhibitory ( $IC_{50}$ ) concentrations were determined. (B) Colony formation assay on cell lines described in (A). Values were normalized to DMSO controls. (C) Apoptosis quantified by Annexin V/PI flow cytometry analysis after treatment with 2  $\mu$ M compound B (left bar graph) or 2  $\mu$ M IN-9 (right bar graph). (D) Western blot (WB) analysis of cleaved caspase-3 in H2122-P and H2122-BT cells treated for 48 hours with 2  $\mu$ M Comp B (upper gels) or 2 $\mu$ M IN-9 (lower gels). Values were normalized to vehicle control. Data are shown as mean  $\pm$  SEM of triplicate biological replicates.  $P$  values: two-sided t-test. \*,  $P < 0.05$  and \*\*,  $P < 0.01$ .

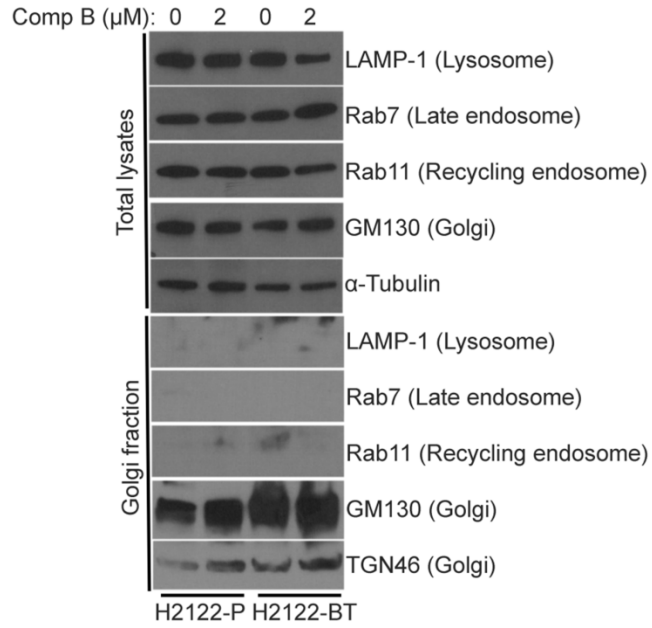

**Figure S2** WB analysis of lysosomal, late endosomal, recycling endosomal, and Golgi markers in Golgi-enriched cellular fractions that were subjected to PI4P ELISA. Total cell lysates included as a control.

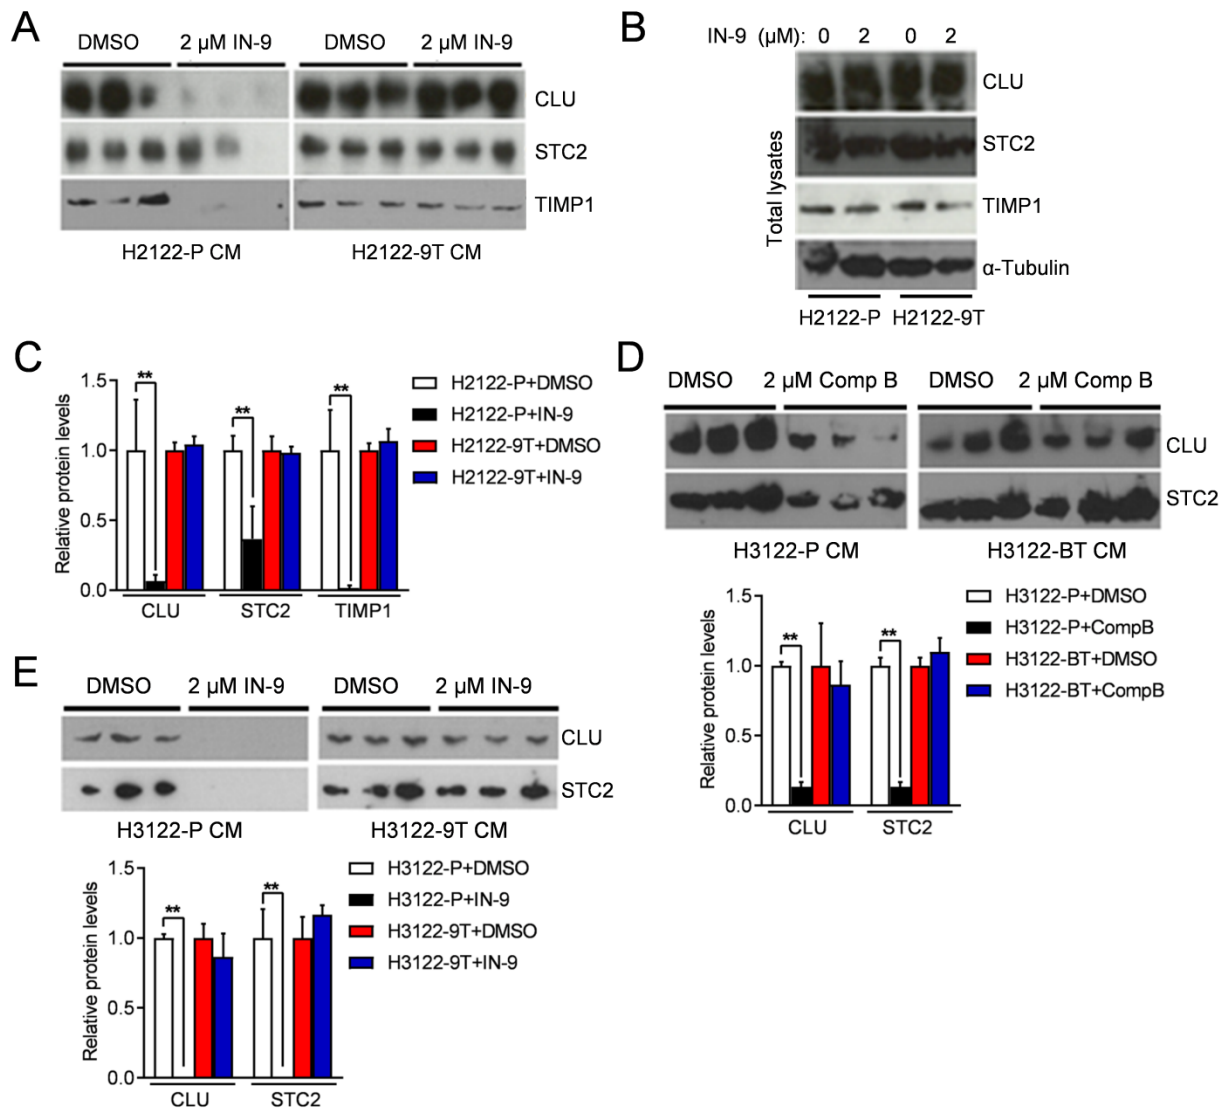

**Figure S3** Drug-tolerant 1q-LUAD cells maintain PI4P-dependent secretion. (A and B) WB analysis of H2122 cells (-P or -9T) after treatment with IN-9 or vehicle (DMSO) to detect CLU, STC2 and TIMP1 in conditioned medium (CM) samples (A) and cell lysates (B). (C) Protein levels in CM were densitometrically quantified and values were normalized to DMSO control. (D and E) WB analysis of CM samples from H3122 cells (-P, -BT, or -9T) after treatment with compound B (D) or IN-9 (E). Protein levels in CM described were densitometrically quantified (bar graphs). Values were normalized to DMSO controls. Data are shown as mean  $\pm$  SEM of triplicate biological replicates. *P* values: one-way ANOVA. \*\*, *P*<0.01.

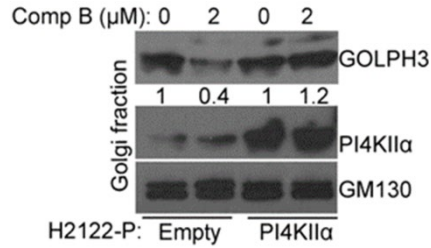

**Figure S4** WB analysis of PI4KII $\alpha$  and GOLPH3 in Golgi-enriched cellular fractions of H2122 cells stably transfected with PI4KII $\alpha$  or empty expression vectors. GM130 served as loading control.

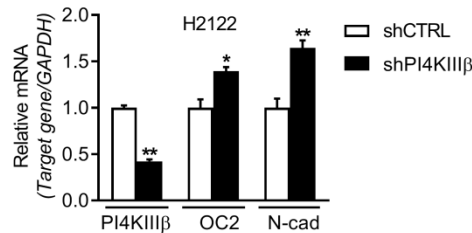

**Figure S5** PI4KIII $\beta$  depletion upregulates predicted miR-218-5p targets. qPCR analysis of PIKIII $\beta$ , OC2 and N-cad mRNA levels. Values were normalized to shRNA control (shCTRL). Data are shown as mean  $\pm$  SEM of triplicate biological replicates. *P* values: two-sided t-test. \*, *P*<0.05 and \*\*, *P*<0.01.

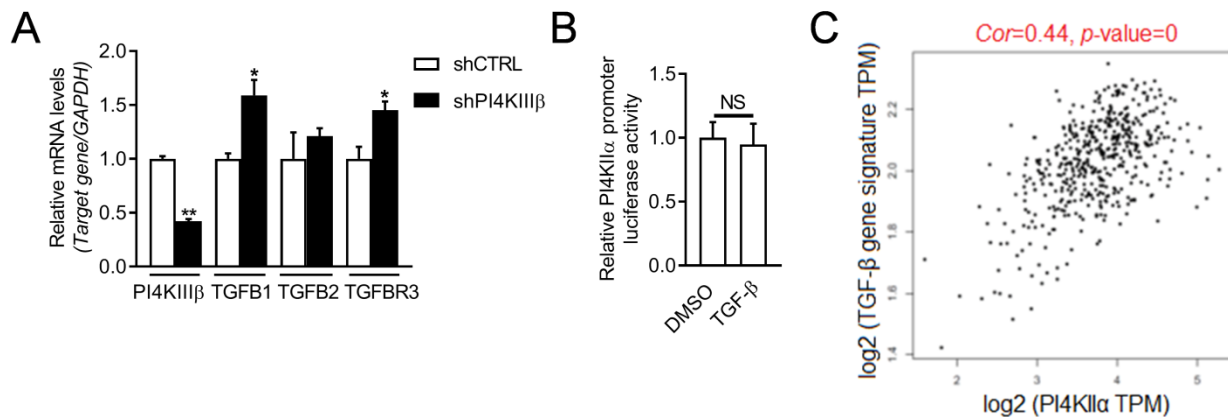

**Figure S6** PI4KIII $\beta$  deficiency activates TGF $\beta$ -dependent signaling. (A) qPCR analysis of TGF- $\beta$ 1 and TGF $\beta$  receptor family members in *PI4KB*-deficient and -replete H2122 cells. Values were normalized to shRNA control. (B) Luciferase assays on H2122 cells transfected with a *PI4K2A* gene promoter reporter and treated with 10 ng/ml TGF- $\beta$  or vehicle (DMSO). Values were normalized to DMSO control. (C) Correlation between PI4KII $\alpha$  mRNA levels and a TGF- $\beta$  gene expression signature in the TCGA LUAD cohort. Data are shown as mean  $\pm$  SEM of triplicate biological replicates. *P* values: two-sided t-test. NS, not significant. \*, *P*<0.05 and \*\*, *P*<0.01

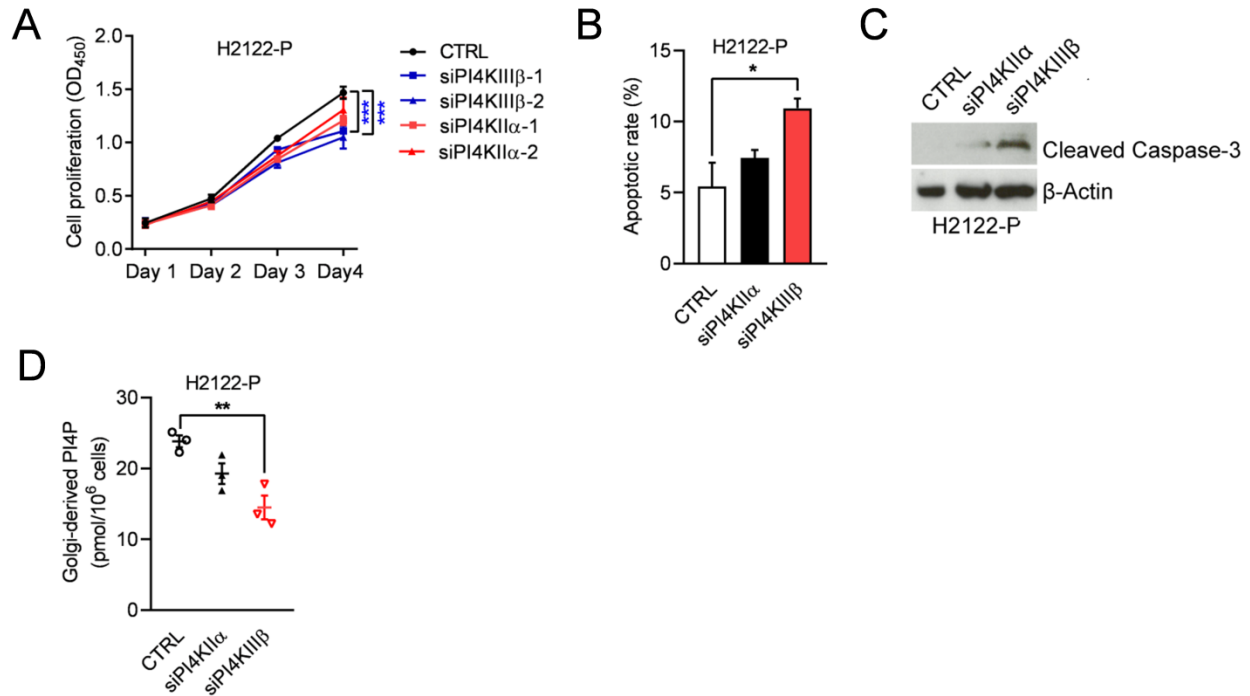

**Figure S7** Parental H2122 cells rely on PI4KIIIβ for survival. (A) Relative densities of siRNA-transfected H2122-P cells in monolayer culture. (B, C) Apoptosis quantified by flow cytometric analysis of Annexin V/PI staining (B) and WB analysis of cleaved caspase-3 (C) in siRNA-transfected H2122-P cells. (D) PI4P ELISA on Golgi-enriched fractions from siRNA-transfected H2122 cells (dot plot). Data are shown as mean  $\pm$  SEM of triplicate biological replicates. *P* values: two-way ANOVA (A), one-way ANOVA (B and D). \*, *P*<0.05, \*\*, *P*<0.01 and \*\*\*, *P*<0.001.

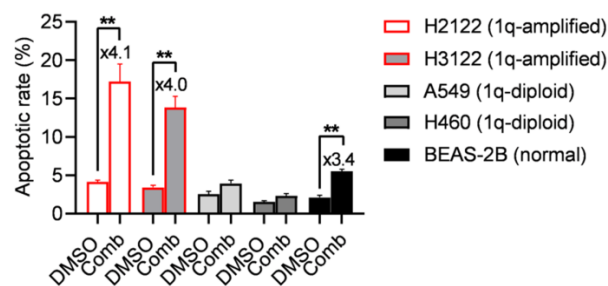

**Figure S8** Apoptosis quantified by flow cytometric detection of Annexin V/PI staining of indicated cells treated for 48 h with a combination of 2  $\mu$ M compound B and 5  $\mu$ M PI-273 (Comb) or vehicle (DMSO) control. Data are shown as mean  $\pm$  SEM of triplicate biological replicates. *P* values: two-sided t-test. \*\*, *P*<0.01.

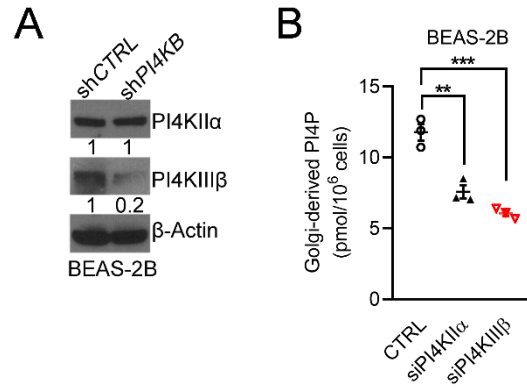

**Figure S9** PI4KIII $\beta$  depletion did not activate the feedforward pathway in BEAS-2B cells. (A) WB analysis of PI4KIII $\beta$  and PI4KII $\alpha$  in BEAS-2B cells stably infected with lentiviruses expressing control (shCTRL) or PI4KIII $\beta$  shRNAs.  $\beta$ -Actin served as loading control. Values were normalized to shCTRL. (B) PI4P ELISA on Golgi-enriched fractions from siRNA-transfected BEAS-2B cells (dot plot). Data are shown as mean  $\pm$  SEM of triplicate biological replicates. *P* values: one-way ANOVA. \*\*, *P*<0.01 and \*\*\*, *P*<0.001.

**Supplementary Table 1** Predicted miRNA binding sites on the 3'UTR of PI4KII $\alpha$  ([www.TargetScan.org](http://www.TargetScan.org)).

| miRNA            | Position in the 3'-UTR | Seed match conserved sites |
|------------------|------------------------|----------------------------|
| has-miR-218-5p   | 159-166                | 8mer                       |
| has-miR-9-5p     | 1296-1302              | 7mer-m8                    |
| has-miR-9-5p     | 1459-1466              | 8mer                       |
| has-miR-140-3p.1 | 1655-1662              | 8mer                       |
| has-miR-323a-3p  | 2260-2267              | 8mer                       |

**Supplementary Table 2** Gene ontology enrichment analysis on significantly up-regulated genes in PI4KIII $\beta$ -depleted H2122 cells.

| Category | Term                                                    | Count in Selected Genes | Count in Total Population | P-value  |
|----------|---------------------------------------------------------|-------------------------|---------------------------|----------|
| GO       | SMAD protein signal transduction                        | 5                       | 15                        | 0.000181 |
| GO       | Positive regulation of SMAD protein import into nucleus | 3                       | 11                        | 0.007414 |
| GO       | Common-partner SMAD protein phosphorylation             | 2                       | 6                         | 0.019983 |
| GO       | SMAD protein import into nucleus                        | 2                       | 7                         | 0.027271 |

**Supplementary Table 3** Oligonucleotides used in this study.

| Name               | Sequence 5'-3'                                             |
|--------------------|------------------------------------------------------------|
| PI4K2A 3UTR-XbaI-F | CTGTCTAGAAGCGAGTCCTACACACAGAG                              |
| PI4K2A 3UTR-NotI-R | ATAGCGGCCGCTCTCAGAAATTCTTCCTG                              |
| 2A 3UTR MUT-R      | ATTTGTTTCTCCCTGTGGGTGGAAAG                                 |
| 2A 3UTR MUT-F      | AGGGAGGAAACAAATCAGGAACAGTGAGTGC                            |
| OC2 3UTR-XbaI-F    | CTGTCTAGAAGCGAGTCCTACACACAGAG                              |
| OC2 3UTR-NotI-R    | ATAGCGGCCGCAATCACATGAAAACGAG                               |
| OC2 3UTR MUT-R     | GACCAATCGCAAGGTGCCAGAATTGTGA                               |
| OC2 3UTR MUT-F     | TCACAATTCTGGCACCTTGCATTGGTC                                |
| OC2 3UTR M3-F      | ACTGTCGGCCAGTTTTAAATATGGACGT                               |
| OC2 3UTR M3-R      | AACTGGCCGACAGTAATTACCATTCTGA                               |
| OC2 3UTR M4-F      | GCTTCTCGGCCATTTTGCAGTTTGCTACA                              |
| OC2 3UTR M4-R      | GCAAAATGGCCGAGAAGCCATATTCTCATCA                            |
| CDH2 3UTR-NotI-R   | ATAGCGGCCGCAGAGGTGTATCATTTATATTC                           |
| CDH2 3UTR-M-F      | GGAGAAAAGTTCTTACGACCAATGTTTTACATAATTTGTAC                  |
| CDH2 3UTR-M-R      | TGGTCGTAAGAACTTTTCTCCCTCC                                  |
| CDH2 3UTR-XbaI-F   | CTGTCTAGAGTATGGTGGAGGTGATGACTG                             |
| PI4K2A P-NheI-F    | TATGCTAGCGGTTCCGGTTCGGTTCGGT                               |
| PI4K2A P-HindIII-R | TATAAGCTTCGGCGCGCTCCACACCAGCGA                             |
| PI4K2A-XhoI-F      | TATCTCGAGATGTACCCATACGATGTTCCAGATTACGCTGACGAGACGAGCCCCTAGT |
| PI4K2A-XhaI-R      | CAGTCTAGATTACCACCATGAAAAGAAGGGCTTCC                        |
| PI4K2A P-F1        | TGTGTAATCTTGGCCGTCCT                                       |
| PI4K2A P-R1        | GGCGGATGCCTTTAAACCTT                                       |
| PI4K2A P-F2        | CAGCAAGTGCCTTAGCTGTT                                       |
| PI4K2A P-R2        | GCTTGCAGGAGTGCAATGTA                                       |
| GAPDH-F            | GTCTCCTCTGACTTCAACAGCG                                     |
| GAPDH-R            | ACCACCCTGTTGCTGTAGCCAA                                     |
| PI4KA-F            | GCTTTAGACCGCAGTCATCCTC                                     |
| PI4KA-R            | CCAGCACAGATGATGAAGGAGC                                     |
| PI4K2A-F           | CGAGGCAATGACAACCTGGCTGA                                    |
| PI4K2A-R           | GCCACCTTGATAACAGGCTCCT                                     |
| PI4KB-F            | TGGTCGGTGGATGACATAGGCG                                     |
| PI4KB-R            | CTGGTGATGCTGTCCACAGAGA                                     |
| SACM1L-F           | GCTGAAGCTGCATATCACACC                                      |
| SACM1L-R           | ACGGTCAATGGTAAGTACGTCA                                     |
| GOLPH3-F           | CTAGAGGCTTGTGGAATGAGACG                                    |
| GOLPH3-R           | GACCGTTTCTGGAGGCTGAGTT                                     |
| OC2-F              | CAGGATGTGGAAGTGGCTTCAG                                     |
| OC2-R              | TGAACACCAGGCGGGACTTCTT                                     |
| CDH2-F             | CCTCCAGAGTTTACTGCCATGAC                                    |
| CDH2-R             | GTAGGATCTCCGCGACTGATTC                                     |



|            |                          |
|------------|--------------------------|
| LEF1-F     | CTACCCATCCTCACTGTCAGTC   |
| LEF1-R     | GGATGTTCCCTGTTTGACCTGAGG |
| TGFB1-F    | TACCTGAACCCGTGTTGCTCTC   |
| TGFB1-R    | GTTGCTGAGGTATCGCCAGGAA   |
| TGFB2-F    | GTCTGTGGATGACCTGGCTAAC   |
| TGFB2-R    | GACATCGGTCTGCTTGAAGGAC   |
| TGFB2-F    | AAGAAGCGTGCTTTGGATGCGG   |
| TGFB2-R    | ATGCTCCAGCACAGAAGTTGGC   |
| TGFB3-F    | CTAAGCGGAATGAGCAGAGGATC  |
| TGFB3-R    | TCTCAACAGCCACTCACGCACA   |
| TGFBRAP1-F | CTGCCTGGCTAGAGAAGCACAA   |
| TGFBRAP1-R | TCATACAGGTCTGAGCGTGTGG   |
